# Supplementary material
Source: ML conference proceedings conference paper supplement (https://openaccess.thecvf.com/content/WACV2025/html/Schwingshackl_Few-Shot_Structure-Informed_Machinery_WACV_2025_paper.html)
Supplement: Supplementary file 1 [file Schwingshackl_Few-Shot_Structure-Informed_Machinery_WACV_2025_supplemental.zip]

# Few-shot Structure-Informed Machinery Part Segmentation with Foundation Models and Graph Neural Networks

## *Supplementary Material*

Michael Schwingshackl      Fabio F. Oberweger      Markus Murschitz  
AIT Austrian Institute of Technology  
Center for Vision and Control

{michael.schwingshackl, fabio.oberweger, markus.murschitz}@ait.ac.at

### A. Hyperparameters

| Hyperparameter     | Short | Description                                                                                              |
|--------------------|-------|----------------------------------------------------------------------------------------------------------|
| NMS Radius         | NR    | SuperPoint non-maximum-supresion box radius for merging close points. Range: [2 - 6]                     |
| Min Points         | $I$   | Minumum amount of generated interest points for an image. Range: [512 - 2048]                            |
| Graph Neighbors    | $k$   | Amount of neighbor connections for each node. Range: [8 - 32]                                            |
| Hidden Layers      | HD    | Depth of Hidden Layers in the Graph Classifier. Range: [256 - 1024]                                      |
| Integration Layers | ID    | Depth of Integration Layers in the Graph Classifier. Range: [128 - 512]                                  |
| SP Threshold       | SPT   | SuperPoint threshold value for each interest point quality score. Range: [ $1.0e^{-04}$ - $5.0e^{-04}$ ] |
| Model Type         | MT    | Graph convolution layer type. Values: [GAT, GAN, SAGE]                                                   |
| Dropout            | DR    | Dropout value for the Graph Classifier. Range: [0.1 - 0.3]                                               |
| Dropout Edge       | DRE   | Edge Dropout value for the Graph Classifier. Range: 0.3 - 0.8]                                           |
| SAM Prompt         | SP    | SAM prompt type for the Segmentation part. Values: [Point(P), Box(B), Point Box(PB)]                     |
| Point Threshold    | PT    | Threshold values for the point's Mahalanobis distance. Range: [0.6 - 1.0]                                |
| Box Threshold      | BT    | Threshold values for the bounding boxes's Mahalanobis distance. Range: [0.6 - 1.0]                       |
| SAM point samples  | SPS   | SAM input point amount for each class: Range [5 - 20]                                                    |

Table 1. List of tunable hyperparameters, including description and ranges.

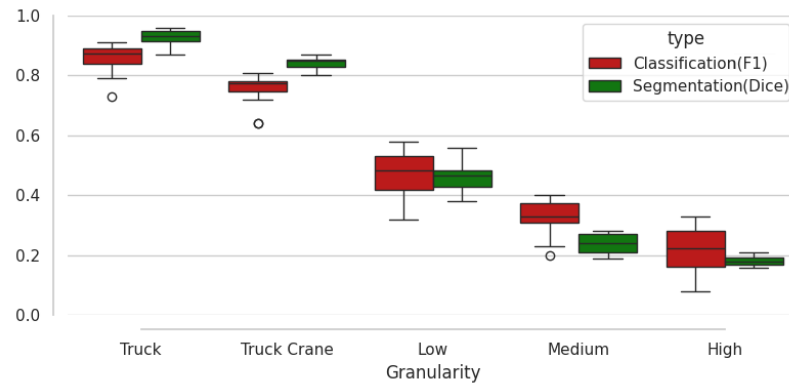

Figure 1. Boxplot visualization of all hyperparameter tuning runs, demonstrating the slight but noticeable differences between various parameter selections at each granularity level. The graph node classification F1 performance is represented in red, and the segmentation Dice score is displayed in green.

### A.1. Hyperparameter Tuning Classification Part

| Hyperparameters |    |      |     |      |     |              |      |     |     | Metrics         |
|-----------------|----|------|-----|------|-----|--------------|------|-----|-----|-----------------|
| RUN             | NR | $I$  | $k$ | HD   | ID  | SPT          | MT   | DR  | DRE | F1 <sub>M</sub> |
| 0               | 2  | 512  | 8   | 1024 | 128 | $1.0e^{-04}$ | GNN  | 0.2 | 0.5 | $0.85 \pm 0.05$ |
| 1               | 4  | 2048 | 8   | 512  | 256 | $2.0e^{-04}$ | SAGE | 0.2 | 0.3 | $0.91 \pm 0.04$ |
| 2               | 2  | 1024 | 32  | 256  | 512 | $2.0e^{-04}$ | GAT  | 0.1 | 0.8 | $0.84 \pm 0.06$ |
| 3               | 4  | 512  | 32  | 512  | 128 | $1.0e^{-04}$ | SAGE | 0.2 | 0.8 | $0.91 \pm 0.04$ |
| 4               | 2  | 512  | 8   | 1024 | 128 | $1.0e^{-04}$ | SAGE | 0.1 | 0.8 | $0.89 \pm 0.04$ |
| 5               | 6  | 512  | 16  | 512  | 128 | $1.0e^{-04}$ | GAT  | 0.1 | 0.5 | $0.84 \pm 0.06$ |
| 6               | 4  | 1024 | 32  | 1024 | 128 | $1.0e^{-04}$ | GNN  | 0.2 | 0.8 | $0.81 \pm 0.04$ |
| 7               | 2  | 1024 | 16  | 1024 | 128 | $2.0e^{-04}$ | SAGE | 0.3 | 0.5 | $0.89 \pm 0.04$ |
| 8               | 2  | 1024 | 8   | 512  | 128 | $5.0e^{-04}$ | GNN  | 0.2 | 0.8 | $0.87 \pm 0.04$ |
| 9               | 4  | 1024 | 16  | 1024 | 512 | $5.0e^{-04}$ | GAT  | 0.3 | 0.3 | $0.83 \pm 0.07$ |
| 10              | 2  | 2048 | 16  | 1024 | 128 | $1.0e^{-04}$ | SAGE | 0.3 | 0.3 | $0.9 \pm 0.04$  |
| 11              | 6  | 2048 | 32  | 512  | 512 | $1.0e^{-04}$ | GNN  | 0.2 | 0.5 | $0.87 \pm 0.05$ |
| 12              | 2  | 1024 | 8   | 512  | 512 | $2.0e^{-04}$ | GAT  | 0.1 | 0.5 | $0.87 \pm 0.05$ |
| 13              | 4  | 1024 | 8   | 1024 | 512 | $1.0e^{-04}$ | GNN  | 0.3 | 0.5 | $0.88 \pm 0.04$ |
| 14              | 6  | 1024 | 32  | 256  | 128 | $1.0e^{-04}$ | GAT  | 0.2 | 0.8 | $0.73 \pm 0.07$ |
| 15              | 4  | 512  | 8   | 1024 | 256 | $1.0e^{-04}$ | SAGE | 0.1 | 0.8 | $0.89 \pm 0.05$ |
| 16              | 6  | 2048 | 8   | 512  | 128 | $5.0e^{-04}$ | GAT  | 0.3 | 0.3 | $0.88 \pm 0.05$ |
| 17              | 6  | 2048 | 16  | 1024 | 256 | $2.0e^{-04}$ | GNN  | 0.3 | 0.3 | $0.88 \pm 0.04$ |
| 18              | 2  | 512  | 32  | 512  | 512 | $5.0e^{-04}$ | GAT  | 0.3 | 0.3 | $0.79 \pm 0.06$ |
| 19              | 2  | 1024 | 32  | 256  | 256 | $1.0e^{-04}$ | SAGE | 0.1 | 0.8 | $0.9 \pm 0.04$  |

Table 2. 20 runs of graph classification hyperparameter tuning with *TRUCK* granularity. Best and worst runs are highlighted in green and red. Metric evaluated on 250 test samples(mean/std).

| Hyperparameters |    |      |     |      |     |              |      |     |     | Metrics         |
|-----------------|----|------|-----|------|-----|--------------|------|-----|-----|-----------------|
| RUN             | NR | $I$  | $k$ | HD   | ID  | SPT          | MT   | DR  | DRE | F1 <sub>M</sub> |
| 0               | 6  | 512  | 16  | 512  | 256 | $5.0e^{-04}$ | GNN  | 0.2 | 0.8 | $0.74 \pm 0.12$ |
| 1               | 6  | 1024 | 16  | 512  | 512 | $2.0e^{-04}$ | GNN  | 0.2 | 0.3 | $0.77 \pm 0.12$ |
| 2               | 6  | 512  | 32  | 512  | 128 | $5.0e^{-04}$ | SAGE | 0.1 | 0.3 | $0.81 \pm 0.11$ |
| 3               | 2  | 512  | 32  | 512  | 128 | $1.0e^{-04}$ | SAGE | 0.1 | 0.8 | $0.8 \pm 0.11$  |
| 4               | 4  | 2048 | 32  | 256  | 128 | $2.0e^{-04}$ | GNN  | 0.2 | 0.5 | $0.76 \pm 0.12$ |
| 5               | 2  | 1024 | 8   | 256  | 256 | $1.0e^{-04}$ | GAT  | 0.1 | 0.5 | $0.78 \pm 0.09$ |
| 6               | 6  | 2048 | 8   | 512  | 512 | $5.0e^{-04}$ | GAT  | 0.3 | 0.8 | $0.78 \pm 0.1$  |
| 7               | 2  | 2048 | 32  | 256  | 512 | $5.0e^{-04}$ | GNN  | 0.2 | 0.5 | $0.76 \pm 0.11$ |
| 8               | 2  | 512  | 32  | 1024 | 128 | $2.0e^{-04}$ | GAT  | 0.3 | 0.8 | $0.64 \pm 0.1$  |
| 9               | 2  | 1024 | 32  | 1024 | 512 | $2.0e^{-04}$ | SAGE | 0.2 | 0.3 | $0.81 \pm 0.11$ |
| 10              | 2  | 1024 | 8   | 256  | 512 | $2.0e^{-04}$ | SAGE | 0.1 | 0.8 | $0.78 \pm 0.1$  |
| 11              | 2  | 2048 | 8   | 1024 | 512 | $1.0e^{-04}$ | SAGE | 0.1 | 0.5 | $0.79 \pm 0.1$  |
| 12              | 4  | 1024 | 8   | 256  | 128 | $5.0e^{-04}$ | GNN  | 0.2 | 0.3 | $0.78 \pm 0.11$ |
| 13              | 6  | 512  | 16  | 1024 | 256 | $1.0e^{-04}$ | GNN  | 0.1 | 0.8 | $0.72 \pm 0.11$ |
| 14              | 4  | 512  | 32  | 256  | 256 | $5.0e^{-04}$ | SAGE | 0.1 | 0.5 | $0.73 \pm 0.12$ |
| 15              | 4  | 1024 | 8   | 512  | 128 | $2.0e^{-04}$ | GNN  | 0.1 | 0.5 | $0.78 \pm 0.1$  |
| 16              | 4  | 1024 | 8   | 512  | 512 | $5.0e^{-04}$ | GAT  | 0.1 | 0.5 | $0.75 \pm 0.1$  |
| 17              | 6  | 512  | 16  | 512  | 256 | $2.0e^{-04}$ | GAT  | 0.3 | 0.5 | $0.64 \pm 0.12$ |
| 18              | 6  | 512  | 8   | 256  | 512 | $5.0e^{-04}$ | GNN  | 0.3 | 0.5 | $0.77 \pm 0.12$ |
| 19              | 2  | 1024 | 16  | 1024 | 128 | $5.0e^{-04}$ | SAGE | 0.1 | 0.8 | $0.8 \pm 0.1$   |

Table 3. 20 runs of graph classification hyperparameter tuning with *TRUCK CRANE* granularity. Best and worst runs are highlighted in green and red. Metric evaluated on 250 test samples(mean/std).

| Hyperparameters |    |      |     |      |     |              |      |     |     | Metrics         |
|-----------------|----|------|-----|------|-----|--------------|------|-----|-----|-----------------|
| RUN             | NR | $I$  | $k$ | HD   | ID  | SPT          | MT   | DR  | DRE | $F1_M$          |
| 0               | 4  | 1024 | 32  | 1024 | 256 | $1.0e^{-04}$ | GAT  | 0.1 | 0.3 | $0.32 \pm 0.09$ |
| 1               | 6  | 2048 | 8   | 256  | 128 | $5.0e^{-04}$ | GNN  | 0.2 | 0.5 | $0.43 \pm 0.12$ |
| 2               | 2  | 1024 | 8   | 1024 | 256 | $5.0e^{-04}$ | GNN  | 0.3 | 0.8 | $0.53 \pm 0.15$ |
| 3               | 4  | 1024 | 32  | 512  | 256 | $5.0e^{-04}$ | SAGE | 0.2 | 0.3 | $0.58 \pm 0.16$ |
| 4               | 2  | 2048 | 16  | 256  | 256 | $5.0e^{-04}$ | SAGE | 0.3 | 0.8 | $0.53 \pm 0.16$ |
| 5               | 6  | 1024 | 16  | 1024 | 256 | $5.0e^{-04}$ | GNN  | 0.1 | 0.5 | $0.42 \pm 0.12$ |
| 6               | 2  | 2048 | 16  | 256  | 256 | $2.0e^{-04}$ | GAT  | 0.1 | 0.8 | $0.5 \pm 0.14$  |
| 7               | 4  | 512  | 16  | 256  | 128 | $2.0e^{-04}$ | GAT  | 0.3 | 0.5 | $0.42 \pm 0.12$ |
| 8               | 6  | 1024 | 32  | 512  | 128 | $1.0e^{-04}$ | GNN  | 0.2 | 0.3 | $0.44 \pm 0.12$ |
| 9               | 4  | 2048 | 8   | 512  | 256 | $2.0e^{-04}$ | SAGE | 0.3 | 0.3 | $0.54 \pm 0.16$ |
| 10              | 4  | 512  | 32  | 256  | 256 | $5.0e^{-04}$ | GNN  | 0.1 | 0.8 | $0.37 \pm 0.11$ |
| 11              | 4  | 512  | 8   | 256  | 512 | $1.0e^{-04}$ | GAT  | 0.2 | 0.8 | $0.36 \pm 0.11$ |
| 12              | 2  | 1024 | 16  | 512  | 512 | $2.0e^{-04}$ | GNN  | 0.1 | 0.8 | $0.53 \pm 0.15$ |
| 13              | 6  | 512  | 8   | 1024 | 512 | $5.0e^{-04}$ | GAT  | 0.2 | 0.3 | $0.35 \pm 0.11$ |
| 14              | 6  | 512  | 8   | 512  | 256 | $1.0e^{-04}$ | GNN  | 0.3 | 0.8 | $0.48 \pm 0.13$ |
| 15              | 6  | 1024 | 16  | 512  | 256 | $1.0e^{-04}$ | GNN  | 0.3 | 0.5 | $0.49 \pm 0.13$ |
| 16              | 2  | 2048 | 8   | 256  | 128 | $1.0e^{-04}$ | GNN  | 0.1 | 0.8 | $0.53 \pm 0.15$ |
| 17              | 2  | 512  | 32  | 256  | 128 | $2.0e^{-04}$ | GAT  | 0.2 | 0.5 | $0.41 \pm 0.12$ |
| 18              | 4  | 2048 | 8   | 1024 | 256 | $2.0e^{-04}$ | SAGE | 0.1 | 0.5 | $0.53 \pm 0.15$ |
| 19              | 2  | 512  | 8   | 512  | 256 | $1.0e^{-04}$ | SAGE | 0.3 | 0.5 | $0.55 \pm 0.15$ |

Table 4. 20 runs of graph classification hyperparameter tuning with *LOW* granularity. Best and worst runs are highlighted in green and red. Metric evaluated on 250 test samples(mean/std).

| Hyperparameters |    |      |     |      |     |              |      |     |     | Metrics         |
|-----------------|----|------|-----|------|-----|--------------|------|-----|-----|-----------------|
| RUN             | NR | $I$  | $k$ | HD   | ID  | SPT          | MT   | DR  | DRE | $F1_M$          |
| 0               | 6  | 2048 | 8   | 512  | 512 | $1.0e^{-04}$ | GAT  | 0.1 | 0.5 | $0.35 \pm 0.1$  |
| 1               | 4  | 2048 | 32  | 1024 | 512 | $1.0e^{-04}$ | GNN  | 0.3 | 0.3 | $0.34 \pm 0.12$ |
| 2               | 6  | 512  | 8   | 1024 | 256 | $1.0e^{-04}$ | SAGE | 0.3 | 0.5 | $0.4 \pm 0.14$  |
| 3               | 6  | 1024 | 32  | 256  | 128 | $2.0e^{-04}$ | GNN  | 0.1 | 0.8 | $0.23 \pm 0.08$ |
| 4               | 2  | 1024 | 16  | 512  | 512 | $1.0e^{-04}$ | GAT  | 0.2 | 0.3 | $0.31 \pm 0.1$  |
| 5               | 2  | 512  | 16  | 256  | 256 | $5.0e^{-04}$ | SAGE | 0.2 | 0.5 | $0.39 \pm 0.14$ |
| 6               | 2  | 2048 | 8   | 256  | 256 | $1.0e^{-04}$ | GNN  | 0.3 | 0.5 | $0.37 \pm 0.14$ |
| 7               | 4  | 1024 | 8   | 512  | 512 | $1.0e^{-04}$ | GNN  | 0.1 | 0.8 | $0.33 \pm 0.1$  |
| 8               | 2  | 1024 | 32  | 1024 | 256 | $2.0e^{-04}$ | SAGE | 0.3 | 0.5 | $0.4 \pm 0.15$  |
| 9               | 2  | 512  | 16  | 512  | 512 | $1.0e^{-04}$ | SAGE | 0.1 | 0.8 | $0.32 \pm 0.1$  |
| 10              | 4  | 1024 | 8   | 256  | 512 | $1.0e^{-04}$ | SAGE | 0.2 | 0.3 | $0.37 \pm 0.13$ |
| 11              | 6  | 512  | 16  | 1024 | 128 | $2.0e^{-04}$ | SAGE | 0.3 | 0.3 | $0.33 \pm 0.11$ |
| 12              | 6  | 1024 | 8   | 512  | 128 | $1.0e^{-04}$ | SAGE | 0.3 | 0.8 | $0.39 \pm 0.14$ |
| 13              | 4  | 1024 | 16  | 1024 | 128 | $2.0e^{-04}$ | GNN  | 0.1 | 0.3 | $0.31 \pm 0.1$  |
| 14              | 6  | 1024 | 16  | 256  | 512 | $5.0e^{-04}$ | GNN  | 0.3 | 0.3 | $0.31 \pm 0.11$ |
| 15              | 2  | 512  | 8   | 512  | 512 | $5.0e^{-04}$ | GNN  | 0.1 | 0.5 | $0.29 \pm 0.1$  |
| 16              | 4  | 512  | 8   | 256  | 128 | $2.0e^{-04}$ | GNN  | 0.2 | 0.5 | $0.31 \pm 0.1$  |
| 17              | 6  | 1024 | 16  | 256  | 512 | $5.0e^{-04}$ | SAGE | 0.2 | 0.8 | $0.28 \pm 0.08$ |
| 18              | 6  | 1024 | 16  | 1024 | 256 | $5.0e^{-04}$ | GAT  | 0.2 | 0.8 | $0.2 \pm 0.06$  |
| 19              | 4  | 512  | 8   | 1024 | 512 | $1.0e^{-04}$ | SAGE | 0.3 | 0.8 | $0.39 \pm 0.13$ |

Table 5. 20 runs of graph classification hyperparameter tuning with *MEDIUM* granularity. Best and worst runs are highlighted in green and red. Metric evaluated on 250 test samples(mean/std).



| Hyperparameters |    |      |     |      |     |              |      |     |     | Metrics         |
|-----------------|----|------|-----|------|-----|--------------|------|-----|-----|-----------------|
| RUN             | NR | $I$  | $k$ | HD   | ID  | SPT          | MT   | DR  | DRE | F1 <sub>M</sub> |
| 0               | 4  | 512  | 16  | 512  | 512 | $1.0e^{-04}$ | SAGE | 0.2 | 0.5 | $0.32 \pm 0.13$ |
| 1               | 2  | 2048 | 16  | 256  | 128 | $1.0e^{-04}$ | SAGE | 0.1 | 0.8 | $0.29 \pm 0.11$ |
| 2               | 6  | 512  | 32  | 512  | 256 | $1.0e^{-04}$ | GAT  | 0.3 | 0.8 | $0.1 \pm 0.03$  |
| 3               | 4  | 2048 | 8   | 512  | 512 | $5.0e^{-04}$ | GAT  | 0.3 | 0.3 | $0.27 \pm 0.09$ |
| 4               | 6  | 512  | 16  | 256  | 512 | $2.0e^{-04}$ | GAT  | 0.1 | 0.8 | $0.14 \pm 0.04$ |
| 5               | 6  | 512  | 8   | 1024 | 256 | $5.0e^{-04}$ | GAT  | 0.1 | 0.3 | $0.13 \pm 0.04$ |
| 6               | 2  | 2048 | 8   | 512  | 128 | $2.0e^{-04}$ | GNN  | 0.3 | 0.5 | $0.28 \pm 0.1$  |
| 7               | 4  | 512  | 8   | 256  | 512 | $1.0e^{-04}$ | GNN  | 0.1 | 0.3 | $0.23 \pm 0.07$ |
| 8               | 4  | 512  | 32  | 256  | 128 | $2.0e^{-04}$ | GAT  | 0.2 | 0.3 | $0.19 \pm 0.06$ |
| 9               | 6  | 1024 | 16  | 512  | 512 | $5.0e^{-04}$ | GAT  | 0.2 | 0.5 | $0.22 \pm 0.07$ |
| 10              | 2  | 512  | 32  | 1024 | 512 | $1.0e^{-04}$ | GAT  | 0.1 | 0.3 | $0.08 \pm 0.03$ |
| 11              | 4  | 512  | 16  | 1024 | 128 | $1.0e^{-04}$ | GNN  | 0.3 | 0.8 | $0.17 \pm 0.06$ |
| 12              | 2  | 512  | 16  | 256  | 256 | $5.0e^{-04}$ | GAT  | 0.3 | 0.5 | $0.22 \pm 0.08$ |
| 13              | 2  | 2048 | 8   | 1024 | 512 | $2.0e^{-04}$ | GNN  | 0.2 | 0.8 | $0.29 \pm 0.12$ |
| 14              | 4  | 512  | 16  | 256  | 256 | $1.0e^{-04}$ | SAGE | 0.1 | 0.5 | $0.33 \pm 0.12$ |
| 15              | 6  | 512  | 16  | 1024 | 512 | $5.0e^{-04}$ | SAGE | 0.3 | 0.5 | $0.22 \pm 0.07$ |
| 16              | 4  | 1024 | 8   | 256  | 128 | $2.0e^{-04}$ | GAT  | 0.3 | 0.5 | $0.24 \pm 0.08$ |
| 17              | 4  | 1024 | 8   | 1024 | 256 | $1.0e^{-04}$ | SAGE | 0.1 | 0.8 | $0.3 \pm 0.12$  |
| 18              | 6  | 1024 | 32  | 512  | 128 | $1.0e^{-04}$ | GAT  | 0.1 | 0.8 | $0.13 \pm 0.04$ |
| 19              | 2  | 2048 | 8   | 512  | 256 | $2.0e^{-04}$ | GAT  | 0.3 | 0.5 | $0.27 \pm 0.09$ |

Table 6. 20 runs of graph classification hyperparameter tuning with **HIGH** granularity. Best and worst runs are highlighted in green and red. Metric evaluated on 250 test samples(mean/std).

## A.2. Hyperparameter Tuning Segmentation Part

| Hyperparameters |    |     |     |     | Metrics         |
|-----------------|----|-----|-----|-----|-----------------|
| RUN             | SP | BT  | PT  | SPS | DICE            |
| 0               | P  | 1.0 | 0.6 | 15  | $0.92 \pm 0.06$ |
| 1               | PB | 0.8 | 0.8 | 10  | $0.94 \pm 0.05$ |
| 2               | B  | 0.6 | 0.6 | 15  | $0.87 \pm 0.09$ |
| 3               | PB | 1.0 | 1.0 | 20  | $0.96 \pm 0.03$ |
| 4               | P  | 1.0 | 0.8 | 15  | $0.93 \pm 0.07$ |
| 5               | PB | 0.6 | 0.6 | 10  | $0.9 \pm 0.07$  |
| 6               | B  | 1.0 | 1.0 | 20  | $0.96 \pm 0.03$ |
| 7               | B  | 0.6 | 1.0 | 20  | $0.87 \pm 0.09$ |
| 8               | B  | 1.0 | 1.0 | 10  | $0.95 \pm 0.08$ |
| 9               | P  | 1.0 | 1.0 | 20  | $0.95 \pm 0.03$ |
| 10              | PB | 1.0 | 1.0 | 20  | $0.96 \pm 0.03$ |
| 11              | B  | 0.6 | 1.0 | 20  | $0.87 \pm 0.1$  |
| 12              | P  | 1.0 | 1.0 | 20  | $0.94 \pm 0.06$ |
| 13              | PB | 0.6 | 0.6 | 10  | $0.89 \pm 0.07$ |
| 14              | P  | 1.0 | 0.6 | 15  | $0.92 \pm 0.04$ |
| 15              | P  | 1.0 | 0.6 | 15  | $0.92 \pm 0.05$ |
| 16              | P  | 0.6 | 1.0 | 15  | $0.95 \pm 0.03$ |
| 17              | PB | 0.8 | 0.6 | 10  | $0.94 \pm 0.04$ |
| 18              | B  | 0.8 | 1.0 | 20  | $0.93 \pm 0.07$ |
| 19              | P  | 0.8 | 0.6 | 10  | $0.92 \pm 0.06$ |

Table 7. 20 runs of segmentation hyperparameter tuning with *TRUCK* granularity. Best and worst runs are highlighted in green and red. Metric evaluated on 250 test samples(mean/std).

| Hyperparameters |    |     |     |     | Metrics         |
|-----------------|----|-----|-----|-----|-----------------|
| RUN             | SP | BT  | PT  | SPS | DICE            |
| 0               | PB | 0.8 | 0.6 | 20  | $0.86 \pm 0.11$ |
| 1               | B  | 0.8 | 0.6 | 5   | $0.85 \pm 0.13$ |
| 2               | PB | 1.0 | 0.6 | 10  | $0.86 \pm 0.11$ |
| 3               | PB | 1.0 | 0.6 | 5   | $0.86 \pm 0.12$ |
| 4               | PB | 1.0 | 1.0 | 15  | $0.85 \pm 0.14$ |
| 5               | P  | 0.6 | 0.8 | 20  | $0.85 \pm 0.14$ |
| 6               | PB | 0.6 | 0.6 | 15  | $0.84 \pm 0.12$ |
| 7               | PB | 1.0 | 0.8 | 5   | $0.86 \pm 0.11$ |
| 8               | P  | 0.8 | 0.8 | 5   | $0.8 \pm 0.16$  |
| 9               | B  | 0.8 | 1.0 | 5   | $0.83 \pm 0.14$ |
| 10              | P  | 0.8 | 1.0 | 15  | $0.8 \pm 0.17$  |
| 11              | B  | 0.6 | 0.6 | 5   | $0.81 \pm 0.14$ |
| 12              | PB | 0.8 | 0.6 | 10  | $0.87 \pm 0.11$ |
| 13              | P  | 0.8 | 0.8 | 20  | $0.83 \pm 0.15$ |
| 14              | PB | 0.6 | 0.8 | 5   | $0.83 \pm 0.12$ |
| 15              | PB | 0.6 | 0.8 | 15  | $0.84 \pm 0.12$ |
| 16              | PB | 1.0 | 0.8 | 15  | $0.85 \pm 0.13$ |
| 17              | P  | 1.0 | 0.8 | 10  | $0.85 \pm 0.14$ |
| 18              | PB | 1.0 | 0.8 | 20  | $0.85 \pm 0.12$ |
| 19              | PB | 1.0 | 0.6 | 20  | $0.85 \pm 0.13$ |

Table 8. 20 runs of segmentation hyperparameter tuning with *TRUCK CRANE* granularity. Best and worst runs are highlighted in green and red. Metric evaluated on 250 test samples(mean/std).

| Hyperparameters |    |     |     |     | Metrics         |
|-----------------|----|-----|-----|-----|-----------------|
| RUN             | SP | BT  | PT  | SPS | DICE            |
| 0               | PB | 0.8 | 1.0 | 20  | $0.51 \pm 0.14$ |
| 1               | PB | 0.8 | 0.6 | 10  | $0.52 \pm 0.14$ |
| 2               | P  | 0.6 | 0.6 | 15  | $0.46 \pm 0.14$ |
| 3               | PB | 0.6 | 0.6 | 10  | $0.56 \pm 0.15$ |
| 4               | P  | 0.6 | 0.8 | 20  | $0.47 \pm 0.14$ |
| 5               | P  | 1.0 | 0.6 | 20  | $0.49 \pm 0.14$ |
| 6               | B  | 1.0 | 1.0 | 5   | $0.43 \pm 0.13$ |
| 7               | P  | 0.8 | 0.6 | 5   | $0.4 \pm 0.13$  |
| 8               | P  | 0.6 | 1.0 | 5   | $0.38 \pm 0.12$ |
| 9               | P  | 0.8 | 0.8 | 10  | $0.44 \pm 0.14$ |
| 10              | P  | 0.6 | 0.6 | 15  | $0.47 \pm 0.14$ |
| 11              | P  | 1.0 | 1.0 | 10  | $0.41 \pm 0.13$ |
| 12              | P  | 0.8 | 0.8 | 15  | $0.45 \pm 0.14$ |
| 13              | P  | 1.0 | 0.8 | 20  | $0.47 \pm 0.15$ |
| 14              | PB | 1.0 | 1.0 | 15  | $0.48 \pm 0.13$ |
| 15              | B  | 0.8 | 1.0 | 5   | $0.49 \pm 0.15$ |
| 16              | P  | 0.8 | 0.8 | 10  | $0.42 \pm 0.12$ |
| 17              | PB | 1.0 | 1.0 | 20  | $0.47 \pm 0.13$ |
| 18              | B  | 1.0 | 0.8 | 5   | $0.43 \pm 0.14$ |
| 19              | B  | 1.0 | 0.8 | 20  | $0.43 \pm 0.14$ |

Table 9. 20 runs of segmentation hyperparameter tuning with **LOW** granularity. Best and worst runs are highlighted in green and red. Metric evaluated on 250 test samples(mean/std).

| Hyperparameters |    |     |     |     | Metrics         |
|-----------------|----|-----|-----|-----|-----------------|
| RUN             | SP | BT  | PT  | SPS | DICE            |
| 0               | P  | 0.6 | 0.8 | 5   | $0.2 \pm 0.07$  |
| 1               | P  | 0.8 | 1.0 | 10  | $0.21 \pm 0.07$ |
| 2               | P  | 1.0 | 0.6 | 5   | $0.2 \pm 0.08$  |
| 3               | P  | 0.8 | 0.8 | 10  | $0.21 \pm 0.08$ |
| 4               | PB | 0.8 | 0.8 | 10  | $0.28 \pm 0.09$ |
| 5               | B  | 1.0 | 0.6 | 20  | $0.22 \pm 0.09$ |
| 6               | PB | 0.8 | 0.8 | 10  | $0.27 \pm 0.09$ |
| 7               | P  | 0.6 | 0.6 | 5   | $0.19 \pm 0.08$ |
| 8               | PB | 0.8 | 1.0 | 10  | $0.27 \pm 0.09$ |
| 9               | PB | 0.8 | 0.6 | 15  | $0.27 \pm 0.1$  |
| 10              | B  | 1.0 | 1.0 | 5   | $0.23 \pm 0.07$ |
| 11              | B  | 0.6 | 0.8 | 5   | $0.23 \pm 0.09$ |
| 12              | P  | 0.6 | 0.6 | 20  | $0.24 \pm 0.08$ |
| 13              | PB | 0.6 | 0.6 | 5   | $0.25 \pm 0.11$ |
| 14              | P  | 1.0 | 0.6 | 10  | $0.21 \pm 0.08$ |
| 15              | PB | 0.6 | 0.8 | 20  | $0.27 \pm 0.1$  |
| 16              | PB | 1.0 | 0.8 | 10  | $0.27 \pm 0.09$ |
| 17              | B  | 1.0 | 1.0 | 10  | $0.24 \pm 0.08$ |
| 18              | PB | 0.8 | 0.6 | 20  | $0.26 \pm 0.1$  |
| 19              | P  | 0.6 | 0.8 | 20  | $0.24 \pm 0.08$ |

Table 10. 20 runs of segmentation hyperparameter tuning with **MEDIUM** granularity. Best and worst runs are highlighted in green and red. Metric evaluated on 250 test samples(mean/std).

| Hyperparameters |    |     |     |     | Metrics         |
|-----------------|----|-----|-----|-----|-----------------|
| RUN             | SP | BT  | PT  | SPS | DICE            |
| 0               | B  | 0.6 | 0.6 | 15  | $0.18 \pm 0.06$ |
| 1               | PB | 1.0 | 0.6 | 10  | $0.2 \pm 0.07$  |
| 2               | P  | 0.6 | 0.8 | 5   | $0.16 \pm 0.05$ |
| 3               | B  | 1.0 | 0.6 | 20  | $0.17 \pm 0.07$ |
| 4               | B  | 0.6 | 0.8 | 10  | $0.18 \pm 0.06$ |
| 5               | P  | 1.0 | 0.8 | 15  | $0.17 \pm 0.06$ |
| 6               | PB | 0.6 | 0.6 | 15  | $0.21 \pm 0.07$ |
| 7               | P  | 0.8 | 1.0 | 20  | $0.18 \pm 0.06$ |
| 8               | B  | 0.8 | 1.0 | 20  | $0.18 \pm 0.06$ |
| 9               | PB | 1.0 | 0.6 | 20  | $0.19 \pm 0.07$ |
| 10              | B  | 0.8 | 1.0 | 15  | $0.18 \pm 0.06$ |
| 11              | PB | 0.6 | 0.8 | 5   | $0.2 \pm 0.06$  |
| 12              | PB | 0.6 | 0.8 | 15  | $0.21 \pm 0.07$ |
| 13              | B  | 1.0 | 1.0 | 5   | $0.17 \pm 0.06$ |
| 14              | PB | 1.0 | 1.0 | 5   | $0.19 \pm 0.07$ |
| 15              | P  | 0.6 | 0.8 | 20  | $0.18 \pm 0.07$ |
| 16              | P  | 0.8 | 0.8 | 20  | $0.18 \pm 0.07$ |
| 17              | B  | 1.0 | 0.6 | 5   | $0.17 \pm 0.06$ |
| 18              | P  | 0.8 | 0.8 | 10  | $0.16 \pm 0.06$ |
| 19              | PB | 0.8 | 0.8 | 15  | $0.21 \pm 0.07$ |

Table 11. 20 runs of segmentation hyperparameter tuning with **HIGH** granularity. Best and worst runs are highlighted in green and red. Metric evaluated on 250 test samples(mean/std).

## B. Samples: *Truck*

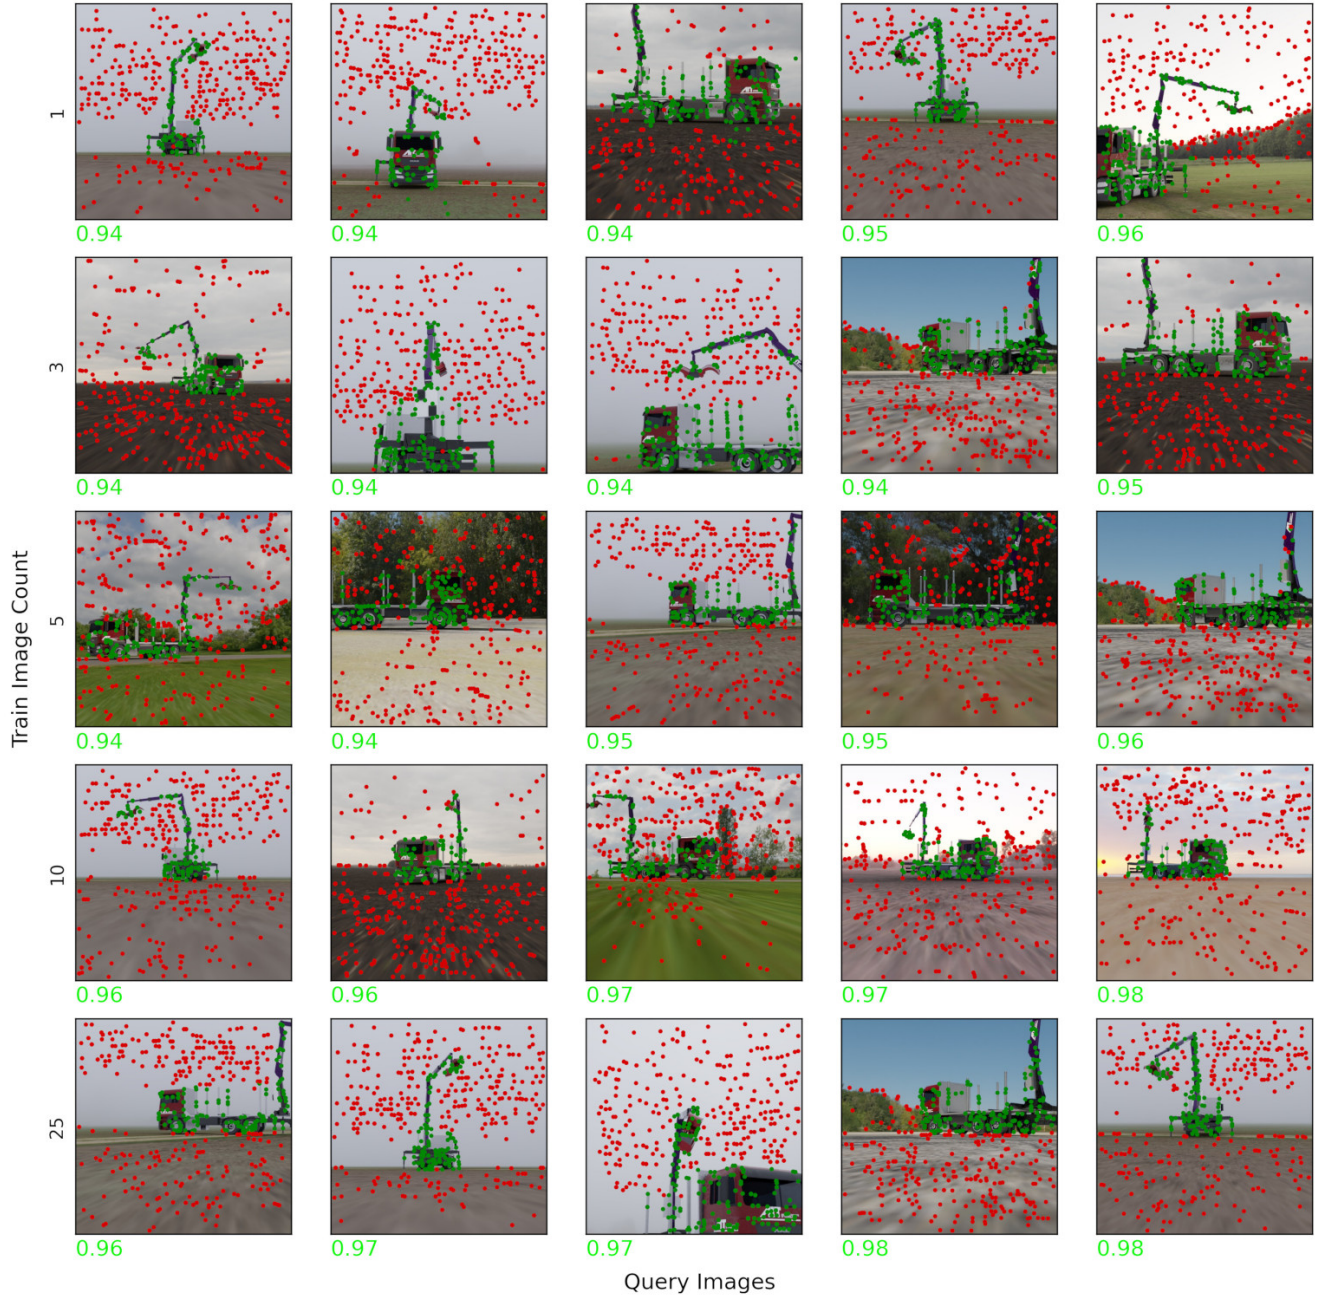

Figure 2. **Truck** granularity graph node classification results for different train sample sizes. Each row shows the best five classification results for the given train sample size measured with  $F1$  score.



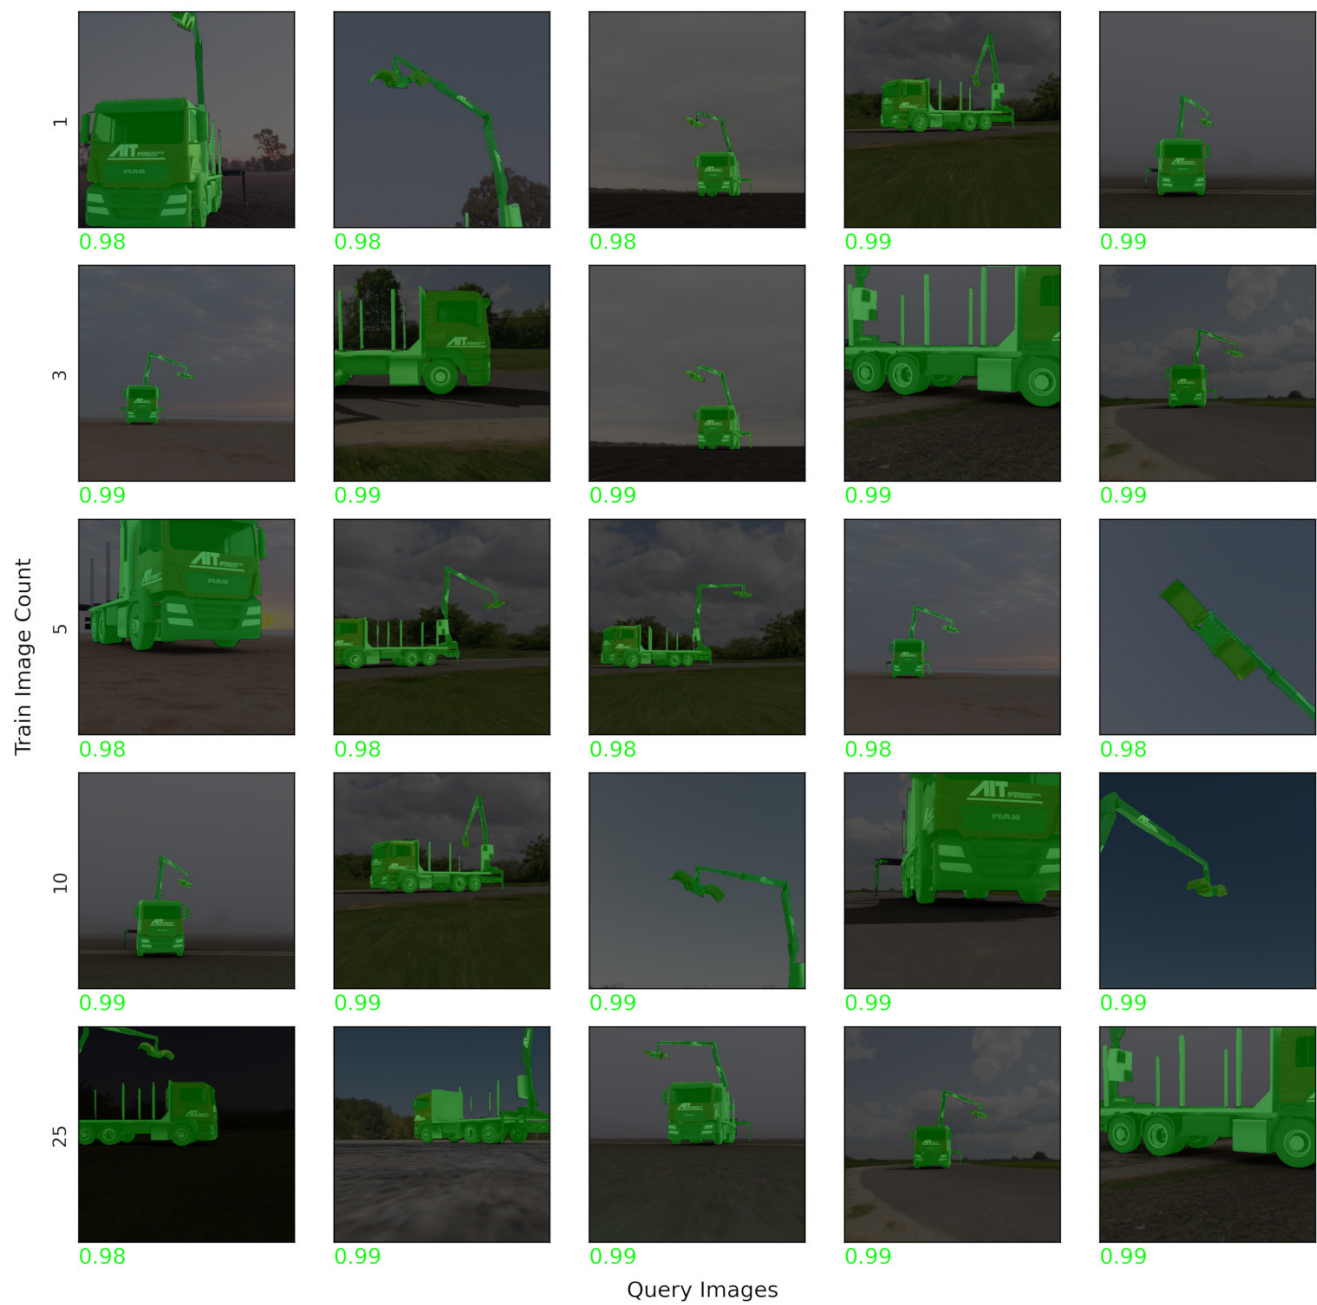

Figure 3. **Truck** granularity semantic segmentation results for different train sample sizes. Each row shows the best five segmentation results for the given train sample size measured with *dice* score.

### C. Samples: *Truck Crane*

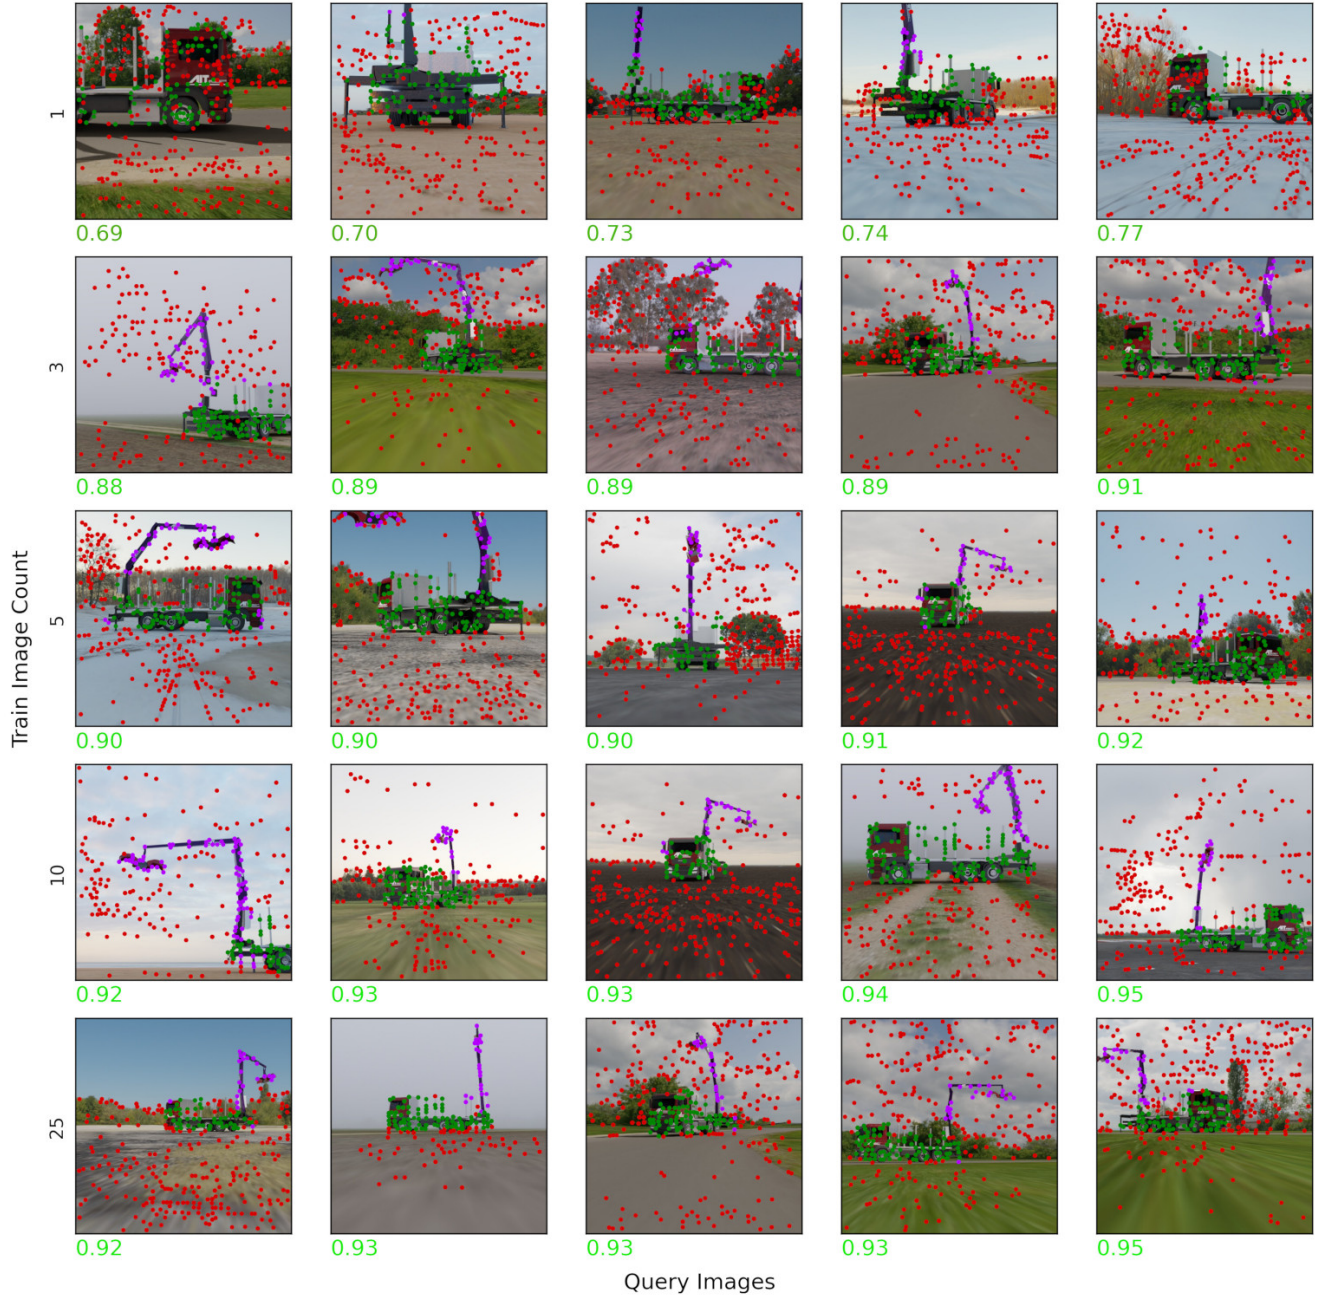

Figure 4. *Truck Crane* granularity graph node classification results for different train sample sizes. Each row shows the best five classification results for the given train sample size measured with  $F1$  score.

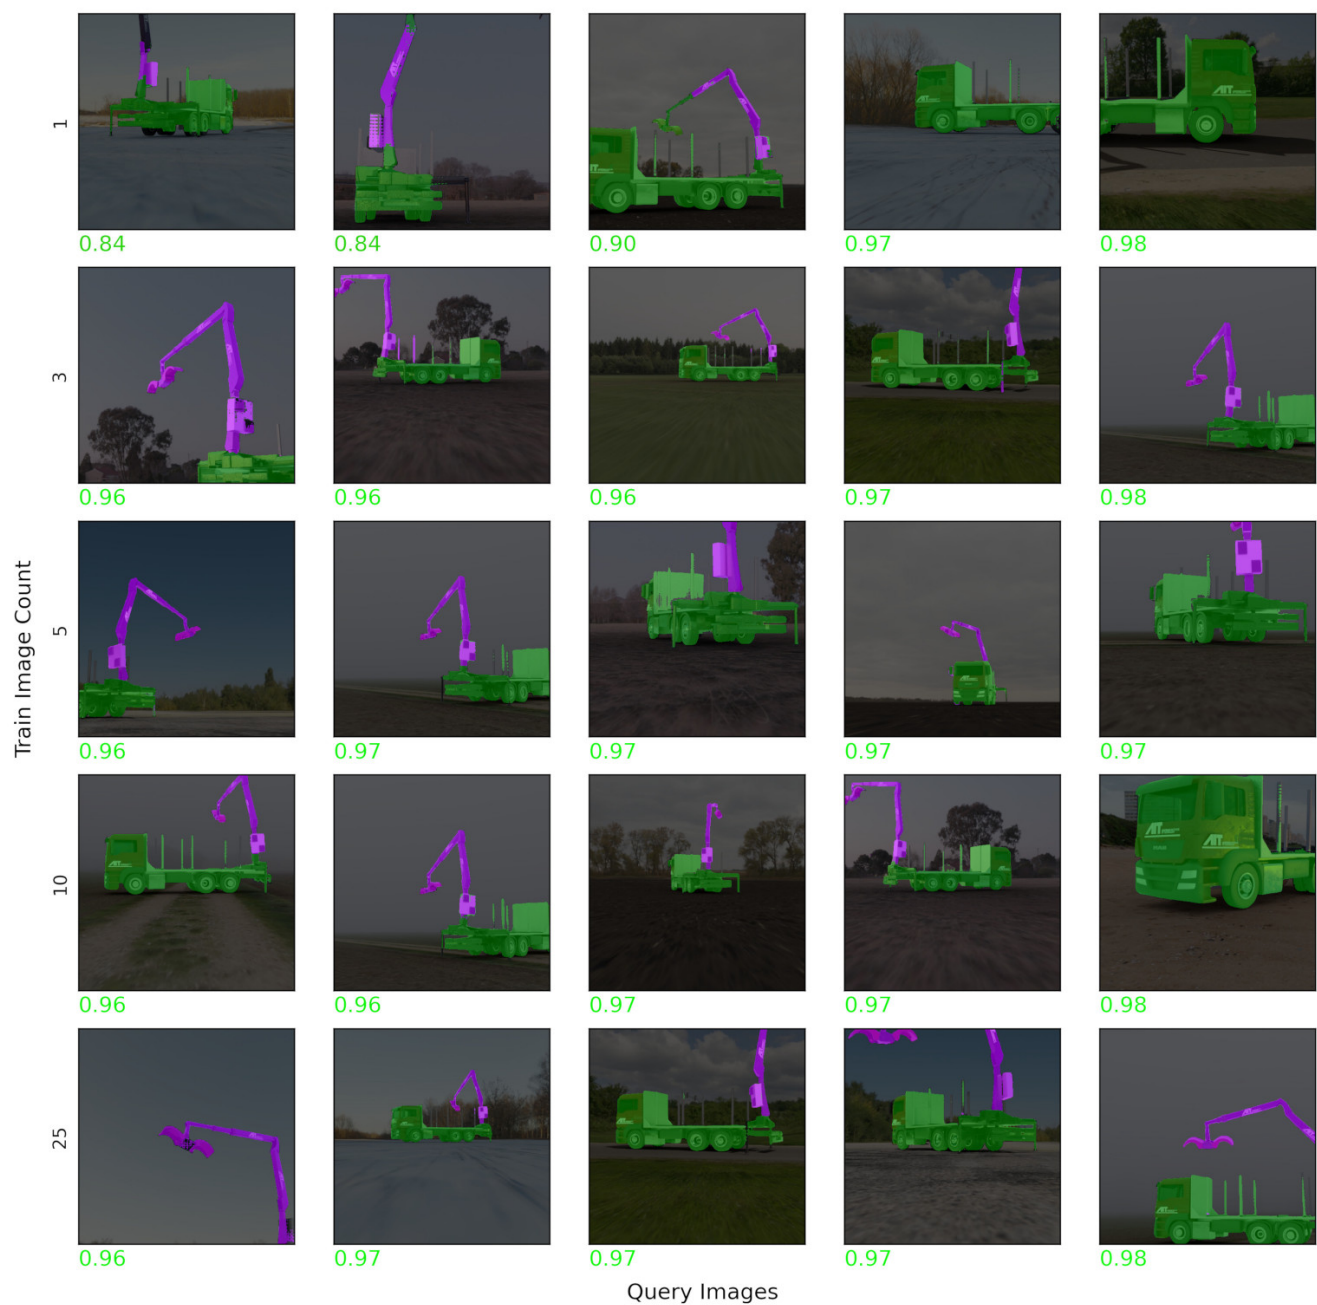

Figure 5. **Truck Crane** granularity semantic segmentation results for different train sample sizes. Each row shows the best five segmentation results for the given train sample size measured with *dice* score.



## D. Samples: *Low*

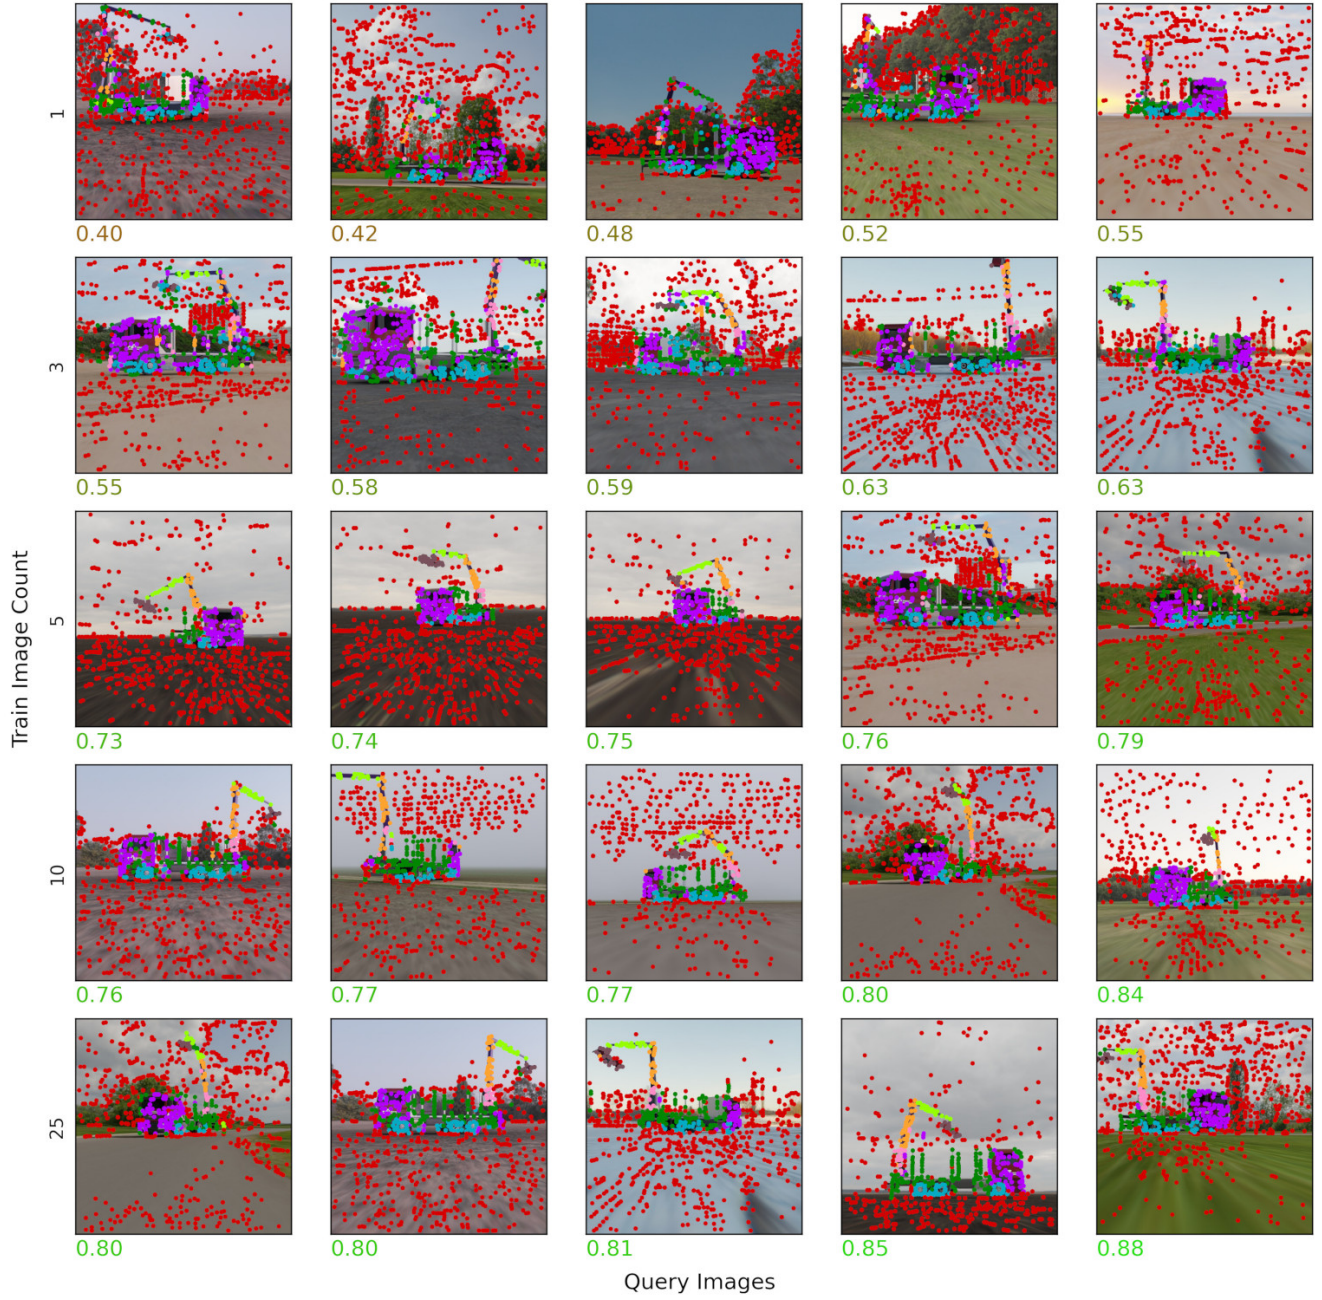

Figure 6. *Low* granularity graph node classification results for different train sample sizes. Each row shows the best five classification results for the given train sample size measured with  $F1$  score.

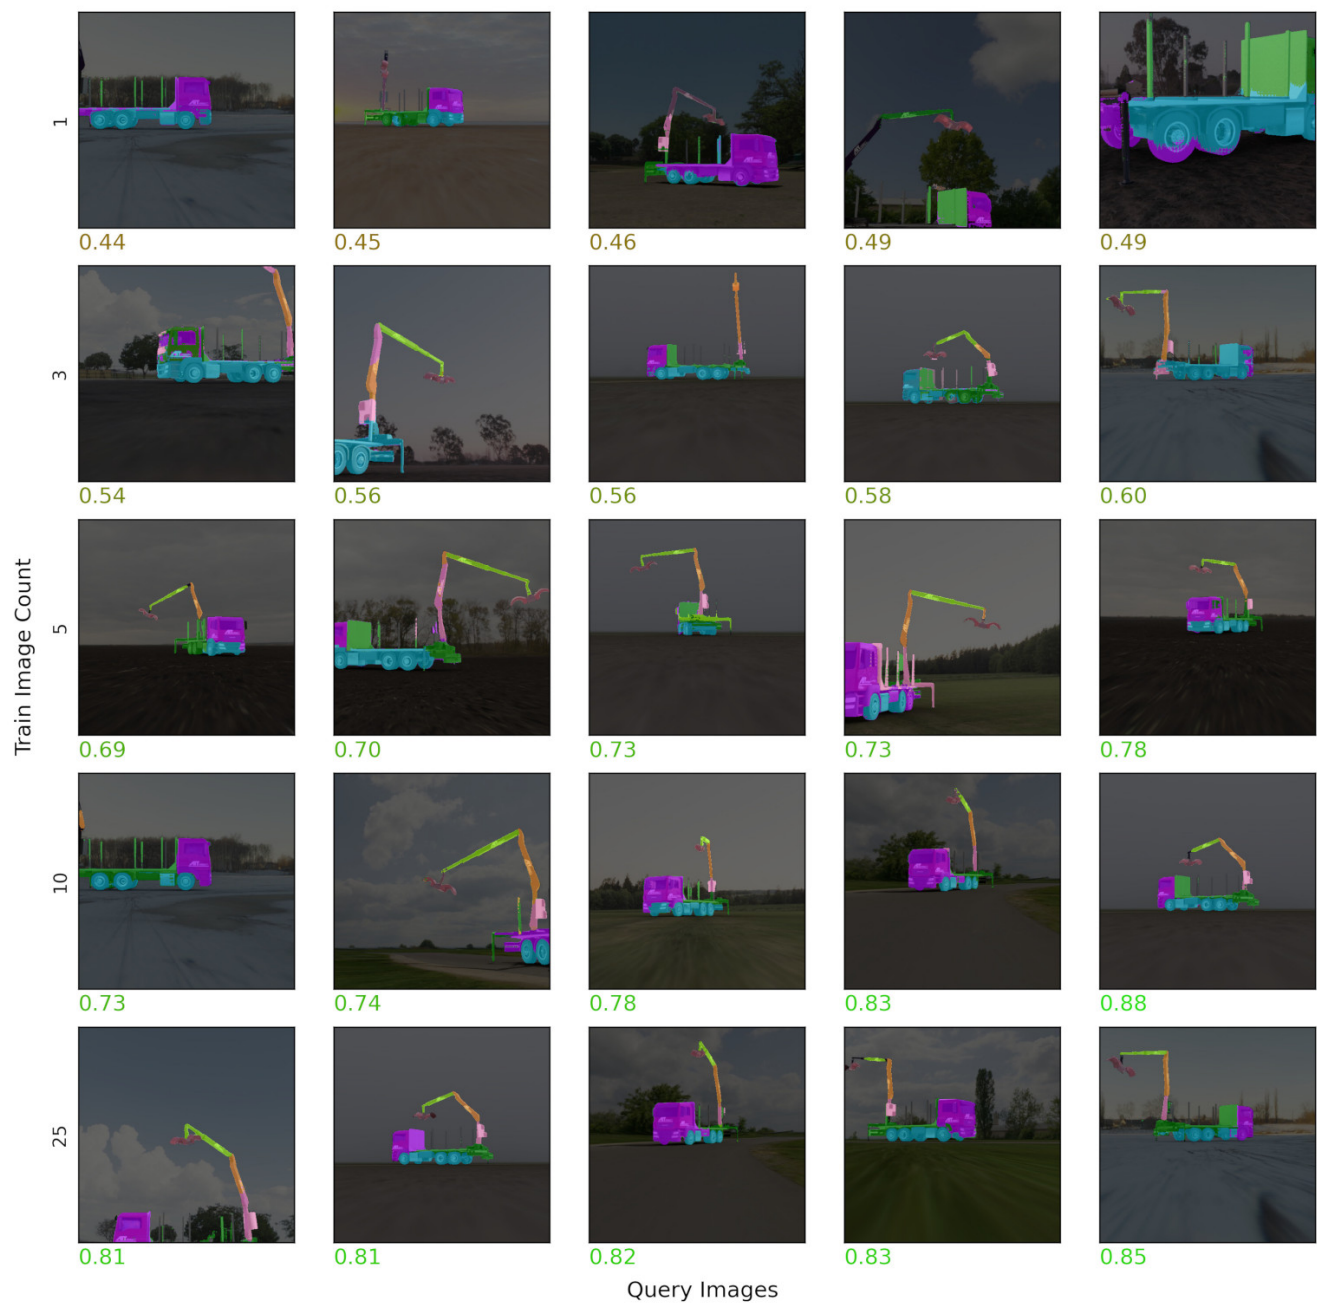

Figure 7. **Low** granularity semantic segmentation results for different train sample sizes. Each row shows the best five segmentation results for the given train sample size measured with *dice* score.



## E. Samples: *Medium*

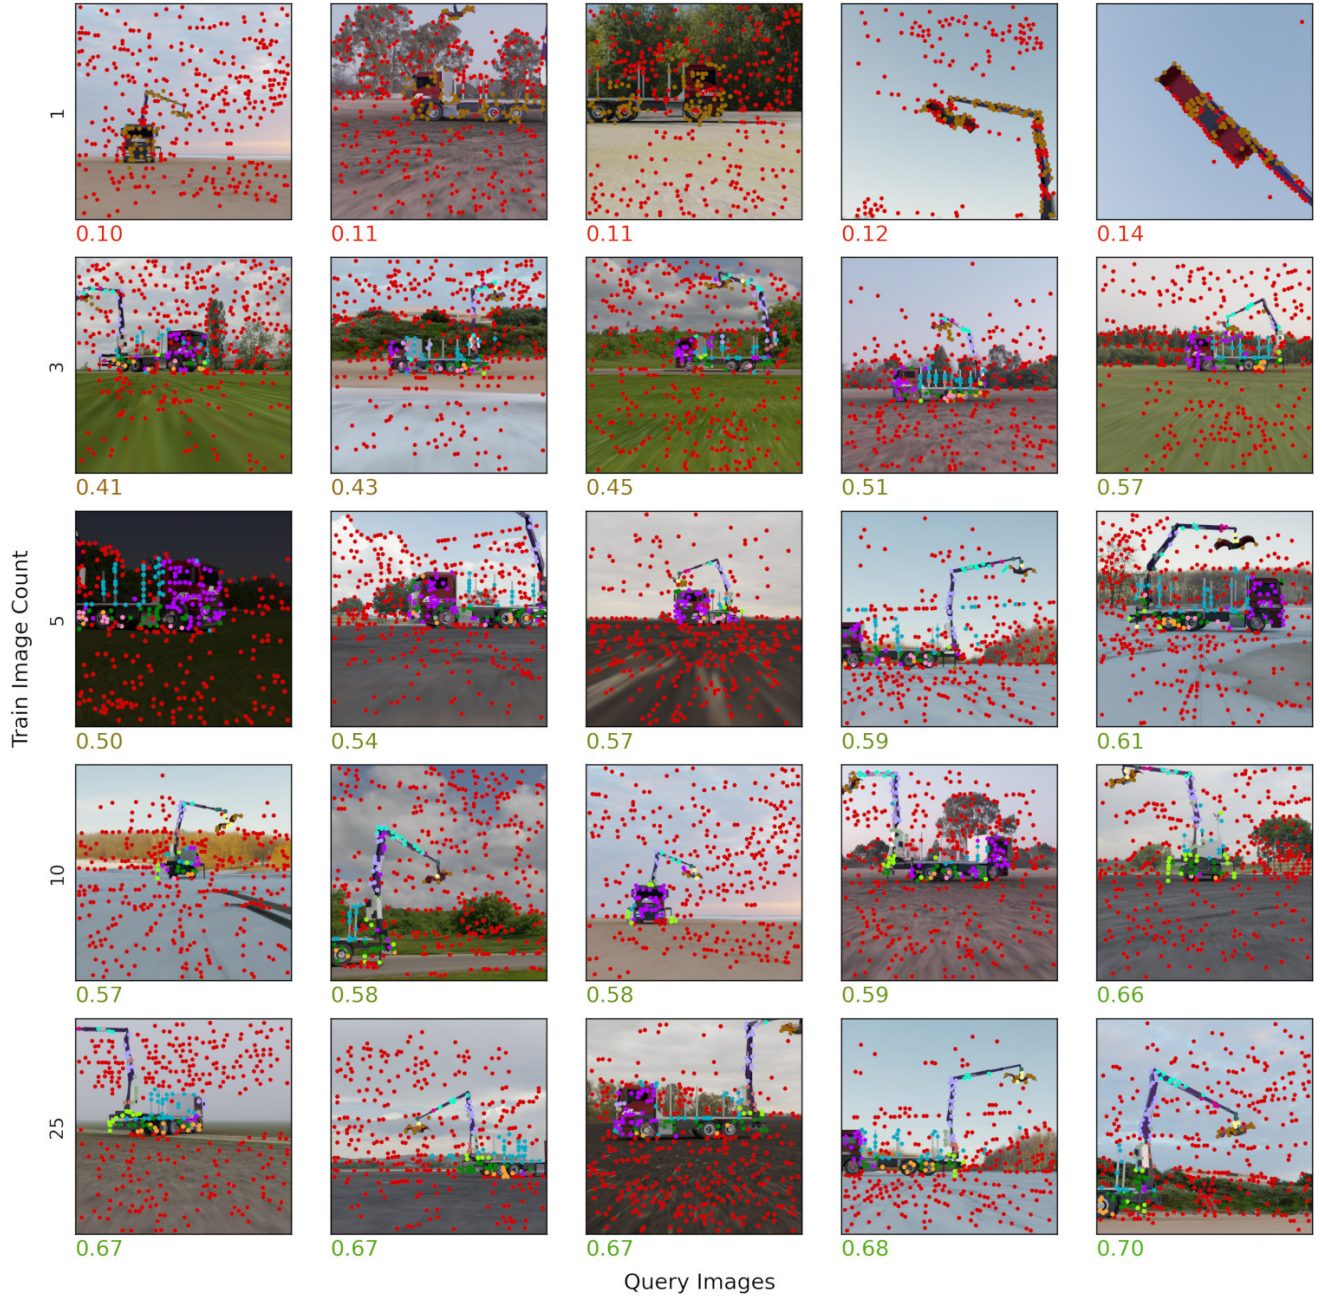

Figure 8. *Medium* granularity graph node classification results for different train sample sizes. Each row shows the best five classification results for the given train sample size measured with  $F1$  score.

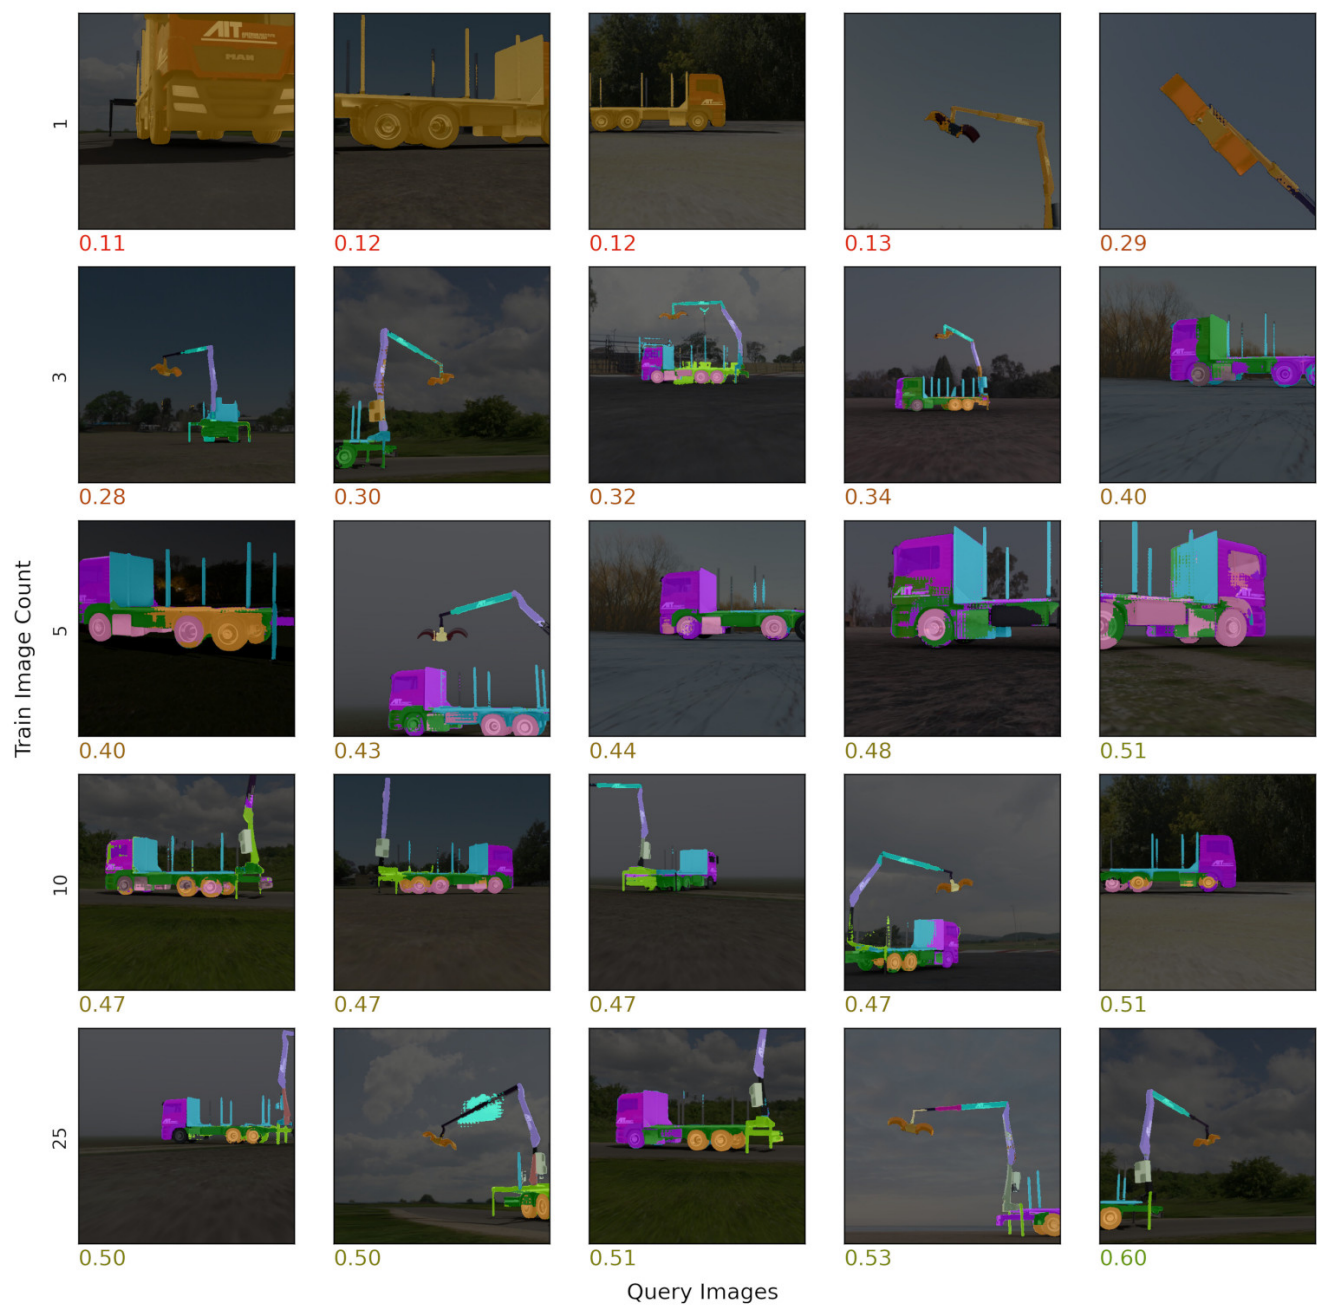

Figure 9. **Medium** granularity semantic segmentation results for different train sample sizes. Each row shows the best five segmentation results for the given train sample size measured with *dice* score.



## F. Samples: *High*

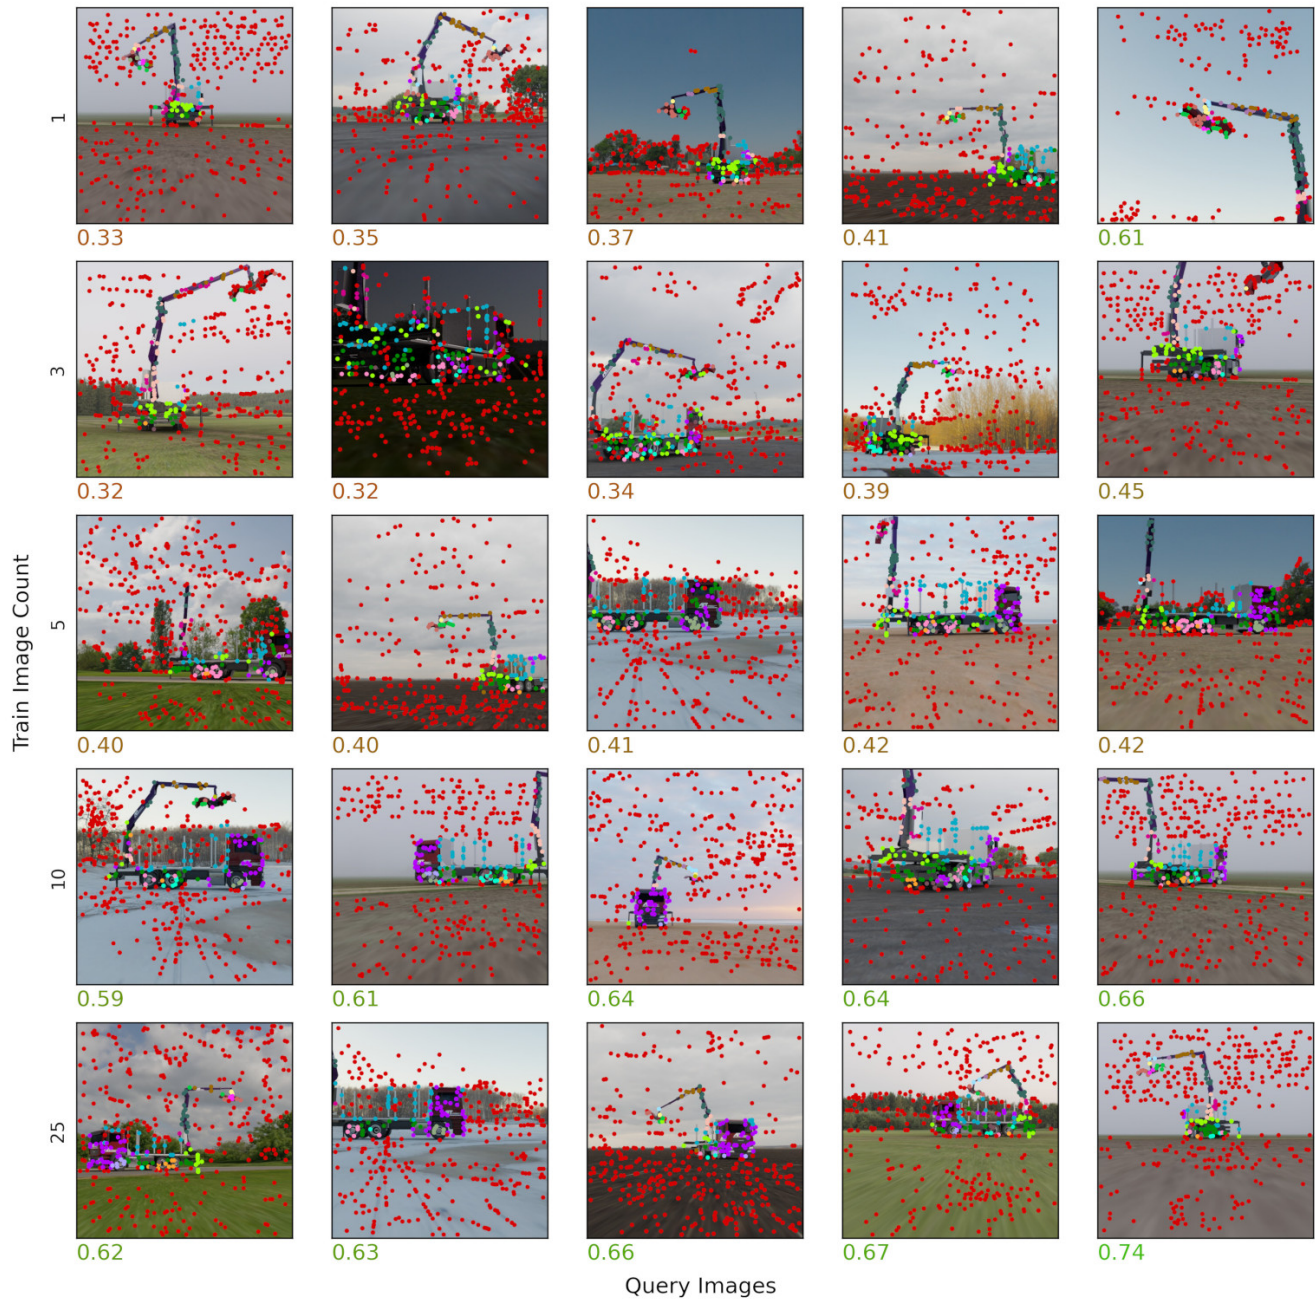

Figure 10. **High** granularity graph node classification results for different train sample sizes. Each row shows the best five classification results for the given train sample size measured with  $F1$  score.

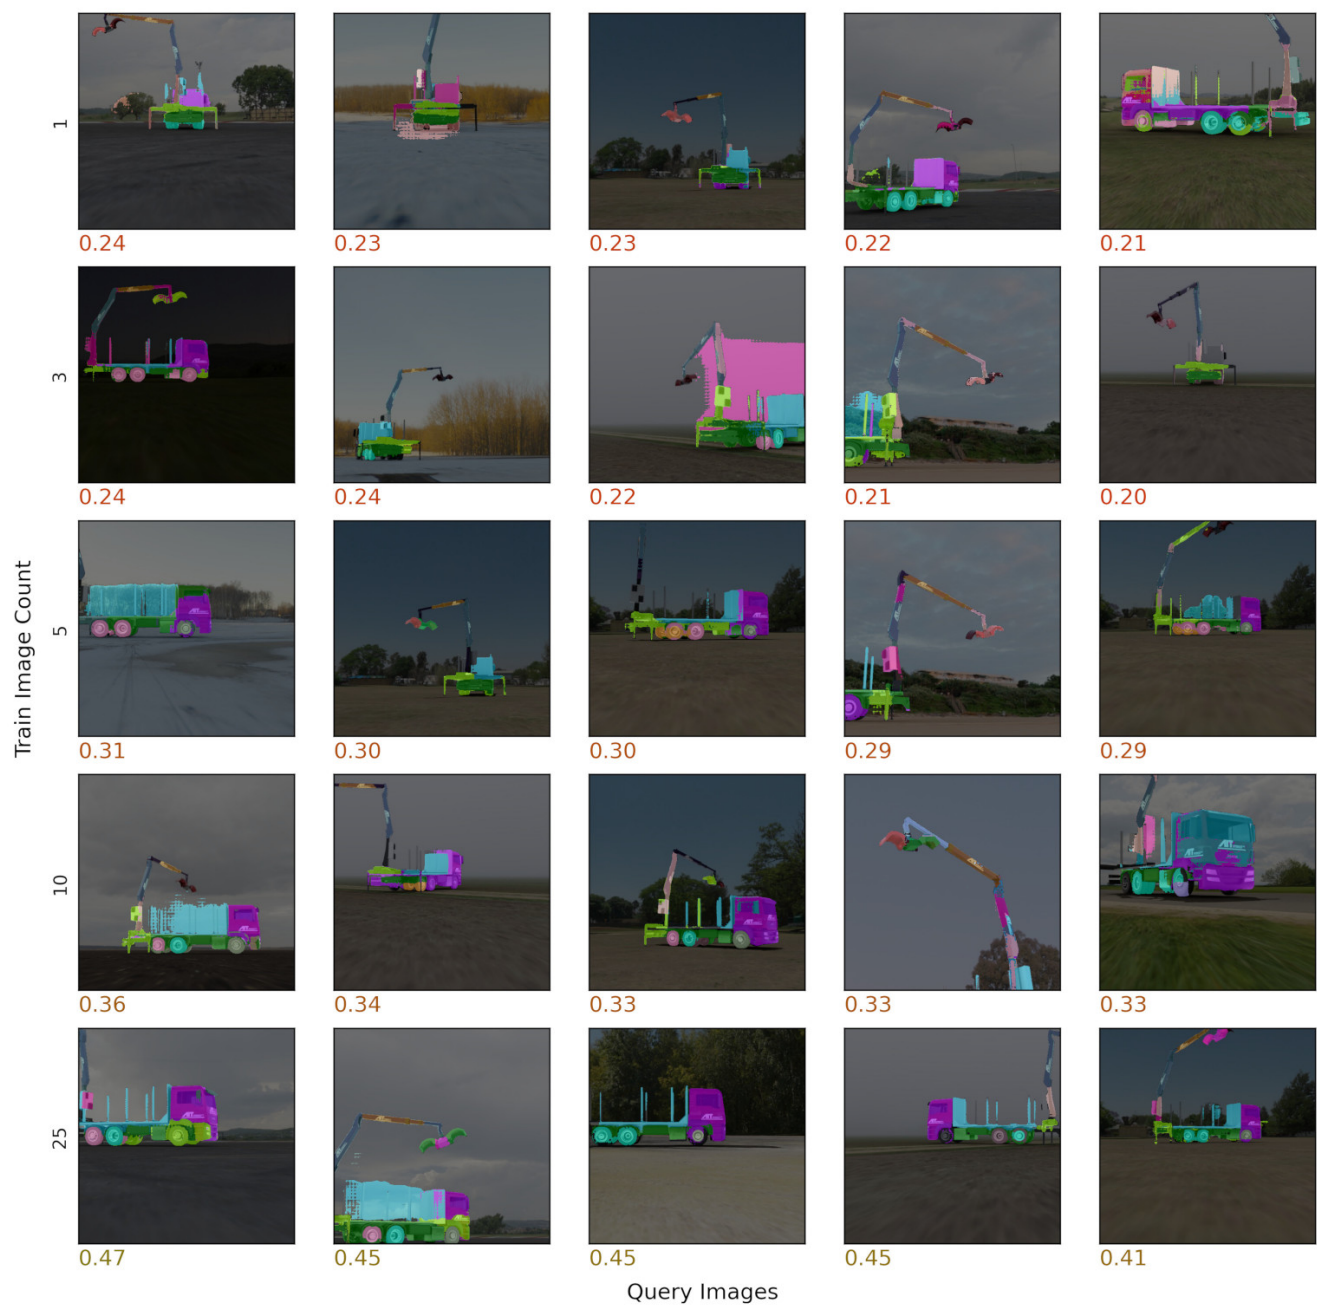

Figure 11. **High** granularity semantic segmentation results for different train sample sizes. Each row shows the best five segmentation results for the given train sample size measured with *dice* score.

## G. Mask R-CNN comparison

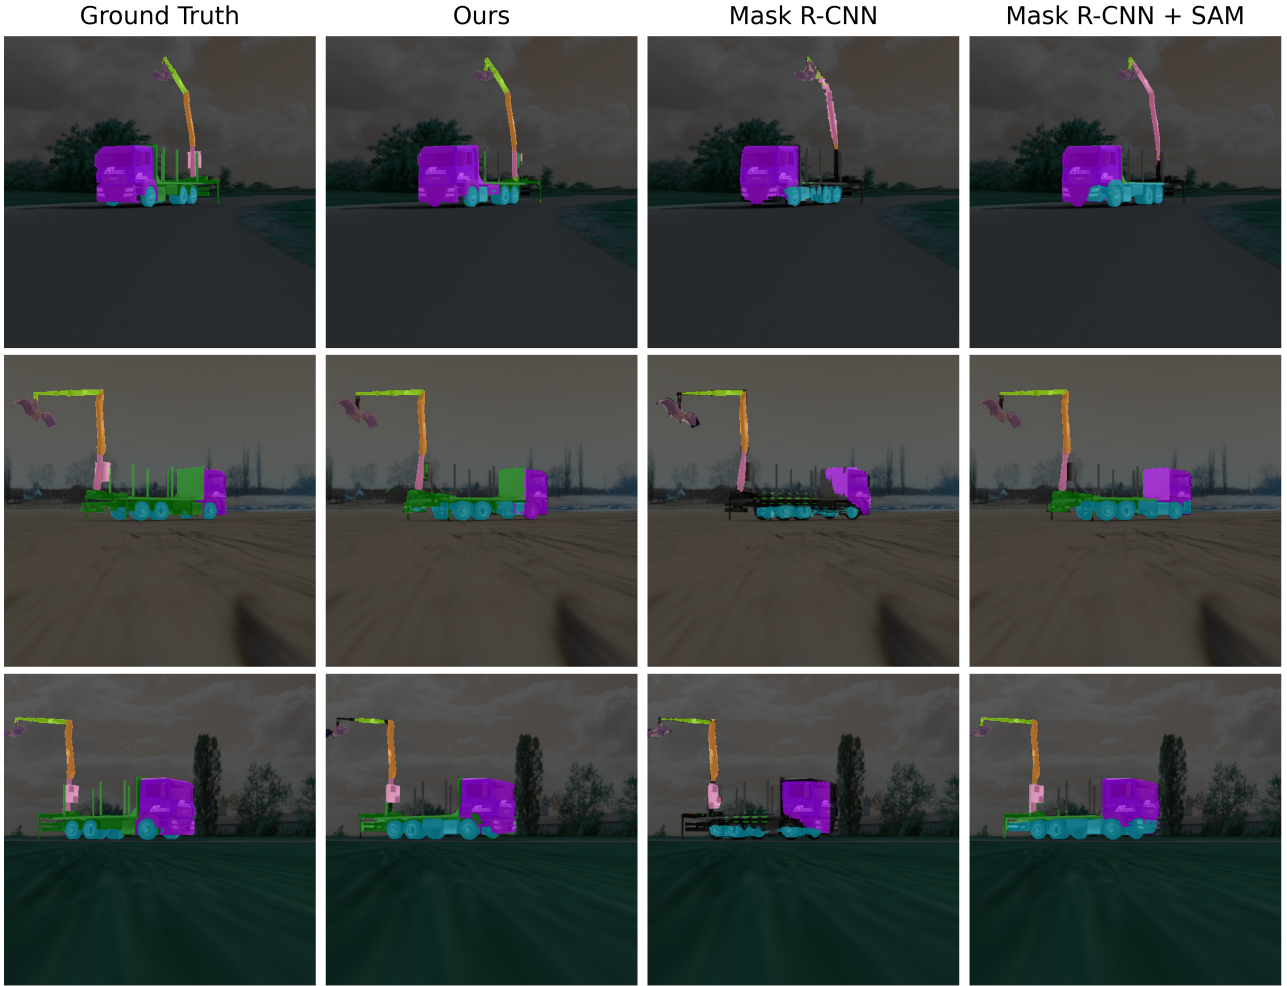

Figure 12. Our method, trained on just 10 samples, demonstrates competitive performance when compared to fine-tuning pre-trained(COCO) models like Mask R-CNN and Mask R-CNN + SAM (which uses estimated bounding boxes as SAM prompts). While Mask R-CNN was trained with 15 training and 10 validation samples, our method achieved superior results with fewer training data. This highlights the robustness of our approach, especially in low-data scenarios, where conventional methods like Mask R-CNN typically require larger datasets to perform optimally.
